# Supplementary material
Source: publisher figshare collection journal article supplement (https://frontiersin.figshare.com/ndownloader/files/24121685)
Supplement: Supplementary file [file 24121685]

## Supplementary Material

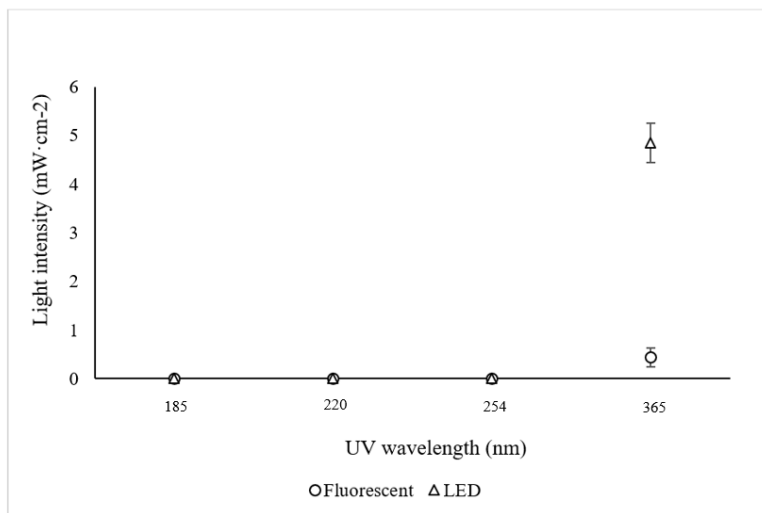

**Supplementary Figure A1.** The measured light intensity with different UV wavelength sensors. The distance from the lamp to the sensor: 20 cm.

**Supplementary Table A2.** NH<sub>3</sub> concentration (ppm) under different light types and treatment time. Values in the table report average concentration ± standard deviation.

| Treatment time (s) | Items     | Photolysis  |            | Photocatalysis |            |
|--------------------|-----------|-------------|------------|----------------|------------|
|                    |           | Fluorescent | LED        | Fluorescent    | LED        |
| 40                 | Control   | 20.8 ± 0.4  | 20.3 ± 0.6 | 20.1 ± 0.1     | 21.6 ± 0.4 |
|                    | Treatment | 20.5 ± 0.9  | 20.3 ± 0.2 | 20.1 ± 0.5     | 21.0 ± 0.2 |
| 100                | Control   | 21.3 ± 0.8  | 27.4 ± 0.3 | 20.4 ± 0.3     | 27.0 ± 0.8 |
|                    | Treatment | 21.1 ± 0.5  | 27.1 ± 0.4 | 19.9 ± 0.6     | 24.8 ± 1.4 |
| 170                | Control   | 23.5 ± 0.6  | 20.9 ± 0.6 | 23.9 ± 0.8     | 23.9 ± 1.5 |
|                    | Treatment | 23.3 ± 0.7  | 20.6 ± 0.4 | 22.6 ± 0.6     | 21.8 ± 1.2 |

**Supplementary Table A2.** N<sub>2</sub>O concentration (ppm) under different light types and treatment time. Values in the table report average concentration ± standard deviation.

| Treatment time (s) | Items     | Photolysis  |             | Photocatalysis |             |
|--------------------|-----------|-------------|-------------|----------------|-------------|
|                    |           | Fluorescent | LED         | Fluorescent    | LED         |
| 40                 | Control   | 0.22 ± 0.00 | 0.30 ± 0.02 | 0.28 ± 0.00    | 0.27 ± 0.01 |
|                    | Treatment | 0.22 ± 0.00 | 0.29 ± 0.00 | 0.28 ± 0.01    | 0.25 ± 0.00 |
| 100                | Control   | 0.32 ± 0.01 | 0.30 ± 0.01 | 0.31 ± 0.00    | 0.28 ± 0.00 |
|                    | Treatment | 0.31 ± 0.01 | 0.29 ± 0.01 | 0.29 ± 0.00    | 0.26 ± 0.00 |

|     |           |                 |                 |                 |                 |
|-----|-----------|-----------------|-----------------|-----------------|-----------------|
| 170 | Control   | $0.33 \pm 0.01$ | $0.30 \pm 0.00$ | $0.31 \pm 0.01$ | $0.27 \pm 0.01$ |
|     | Treatment | $0.32 \pm 0.01$ | $0.27 \pm 0.01$ | $0.29 \pm 0.01$ | $0.24 \pm 0.01$ |

**Supplementary Table A3.** Comparison of odor unit ( $\text{OU}_e \cdot \text{m}^{-3}$ ) under different light types and treatment time. Values in the table report average concentration  $\pm$  standard deviation.

| Retention time(s) | Items     | Photolysis       |                   | Photocatalysis   |                  |
|-------------------|-----------|------------------|-------------------|------------------|------------------|
|                   |           | Fluorescent      | LED               | Fluorescent      | LED              |
| 40                | Control   | $555.1 \pm 6.79$ | $263.6 \pm 14.1$  | $541.4 \pm 89.1$ | $672.2 \pm 47.4$ |
|                   | Treatment | $554.8 \pm 40.7$ | $258.0 \pm 19.3$  | $504.8 \pm 35.4$ | $566.7 \pm 79.2$ |
| 100               | Control   | $768.0 \pm 85.6$ | $722.8 \pm 40.0$  | $672.2 \pm 15.2$ | $740.1 \pm 20.2$ |
|                   | Treatment | $652.7 \pm 41.2$ | $837.7 \pm 47.0$  | $609.9 \pm 44.6$ | $686.2 \pm 27.6$ |
| 170               | Control   | $616.7 \pm 34.5$ | $618.5 \pm 50.1$  | $626.7 \pm 39.3$ | $581.8 \pm 24.7$ |
|                   | Treatment | $576.8 \pm 57.4$ | $559.0 \pm 106.5$ | $579.2 \pm 45.7$ | $474.9 \pm 37.8$ |

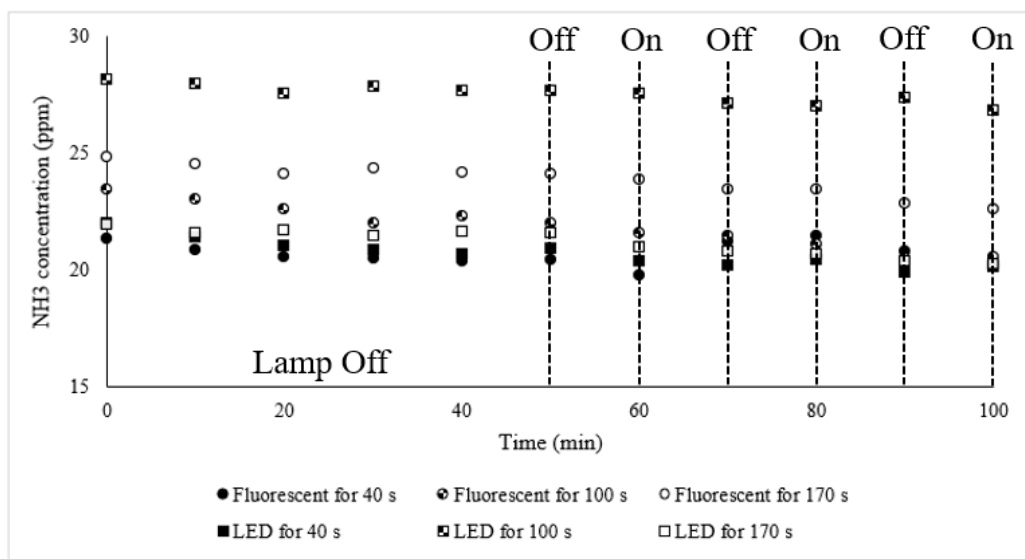

**Supplementary Figure A2.** Change of  $\text{NH}_3$  concentration under the photolysis condition.

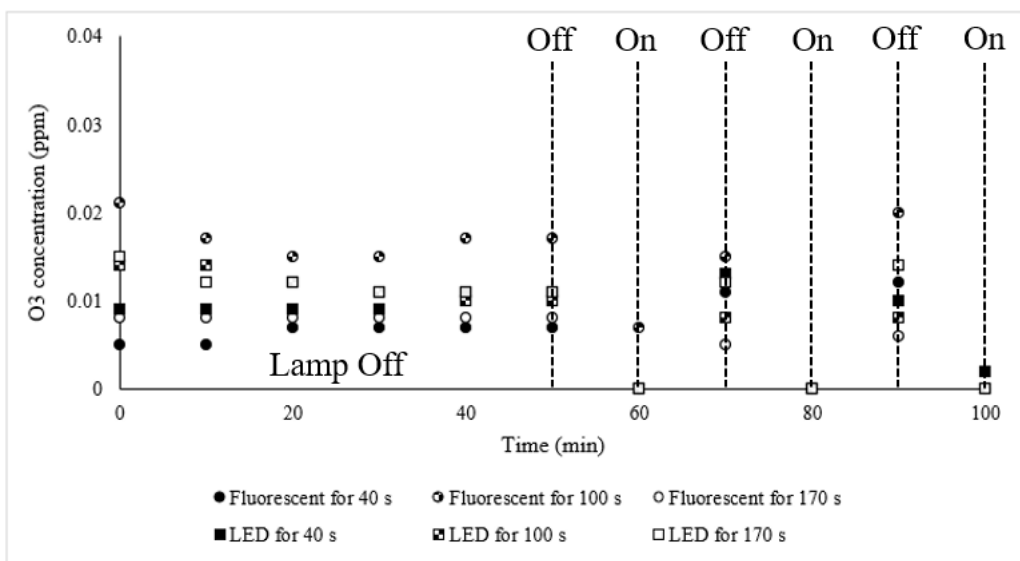

**Supplementary Figure A3.** Change of O<sub>3</sub> concentration under the photolysis condition.

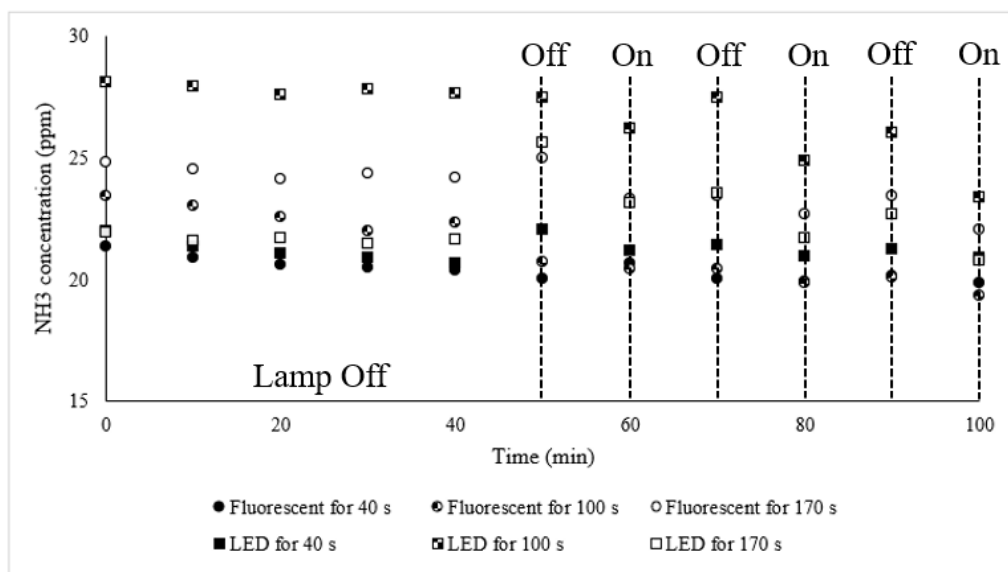

**Supplementary Figure A4.** Change of NH<sub>3</sub> concentration under the photocatalysis condition.

**Supplementary Table A4.** Changes of NH<sub>3</sub> concentration and % reduction under photocatalysis in three consecutive experiments illustrated in Figure 4A (representing statistically significant treatment).

| UV-A type               | First trial |      |      | Second trial |      |      | Third trial |      |      |
|-------------------------|-------------|------|------|--------------|------|------|-------------|------|------|
|                         | Fluorescent | LED  | LED  | Fluorescent  | LED  | LED  | Fluorescent | LED  | LED  |
| T time (s) <sup>1</sup> | 170         | 100  | 170  | 170          | 100  | 170  | 170         | 100  | 170  |
| Control (ppm)           | 25.0        | 27.5 | 25.6 | 23.5         | 27.5 | 23.5 | 23.4        | 26.0 | 22.7 |
| Treatment (ppm)         | 23.3        | 26.2 | 23.1 | 22.7         | 24.9 | 21.7 | 22.1        | 23.3 | 20.8 |
| % reduction             | 6.5         | 4.5  | 9.8  | 3.3          | 9.5  | 7.7  | 5.8         | 10.4 | 8.5  |

Note: <sup>1</sup> treatment time.

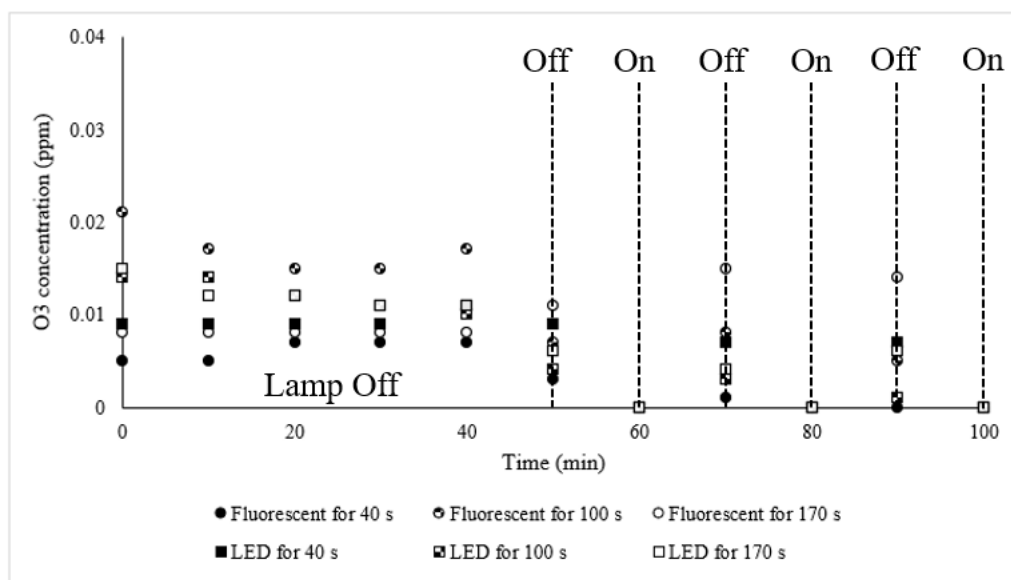

**Supplementary Figure A5.** Change of O<sub>3</sub> concentration under the photocatalysis condition.

**Supplementary Table A5.** Changes of O<sub>3</sub> concentration and % reduction under photocatalysis in three consecutive experiments illustrated in Figure 5A (A repeated reduction of 100% was achieved in all photocatalysis treatment conditions).

| UV-A type          | First trial |       | Second trial |       | Third trial |       |
|--------------------|-------------|-------|--------------|-------|-------------|-------|
|                    | Fluorescent | LED   | Fluorescent  | LED   | Fluorescent | LED   |
| Treatment time (s) | 170         | 170   | 170          | 170   | 170         | 170   |
| Control (ppm)      | 0.011       | 0.006 | 0.015        | 0.004 | 0.014       | 0.006 |
| Treatment (ppm)    | 0           | 0     | 0            | 0     | 0           | 0     |
| % reduction        | 100         | 100   | 100          | 100   | 100         | 100   |
